# Supplementary material for: Vaccine Hesitancy among European Parents—Psychological and Social Factors Influencing the Decision to Vaccinate against HPV: A Systematic Review and Meta-Analysis
Source: MDPI journal article supplement (doi:10.3390/vaccines12020127), 2024-01-26
Supplement: s1 [file s1]

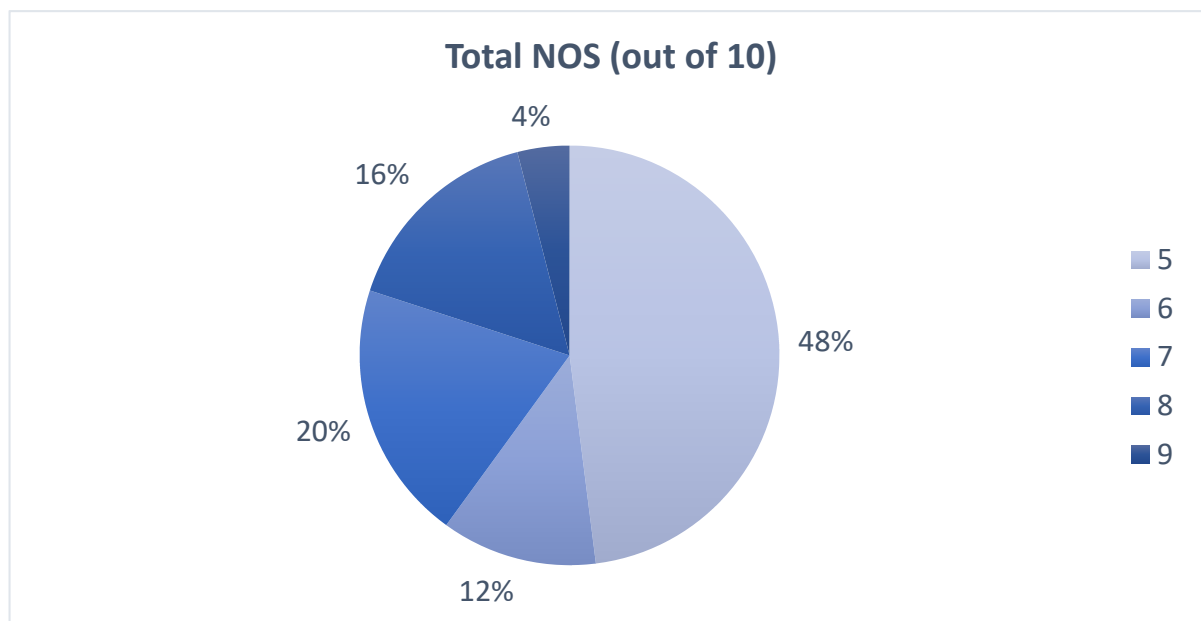

**Chart 1: NOS scoring for the included publications**

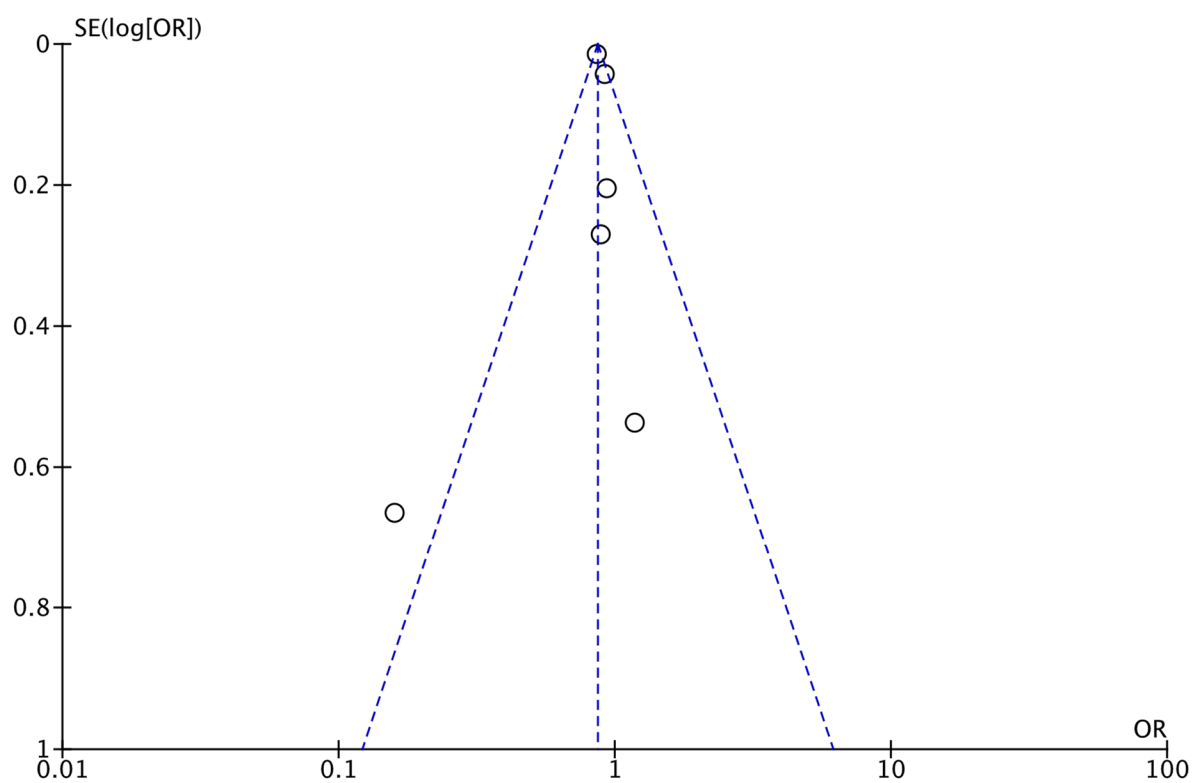

**Figure S1: Funnel plot for the age of parent comparison**

**Table S1: Sensitivity analysis for the age of parent comparison**

| Study                 | Overall OR | Z    | P         | 95% CI      | I <sup>2</sup> | Initial CI  |
|-----------------------|------------|------|-----------|-------------|----------------|-------------|
| Brabin et al 2006     | 0.86       | 9.56 | < 0.00001 | 0.84 - 0.89 | 55%            | 0.84 - 0.89 |
| Dahlstrom et al 2009  | 0.85       | 9.47 | < 0.00001 | 0.83 - 0.88 | 43%            |             |
| Donders et al 2007    | 0.86       | 9.58 | < 0.00001 | 0.84 - 0.89 | 53%            |             |
| Haesebaert et al 2014 | 0.86       | 9.48 | < 0.00001 | 0.84 - 0.89 | 0%             |             |
| Hansen et al 2015     | 0.91       | 2.26 | 0.02      | 0.83 - 0.99 | 44%            |             |
| Pelucchi et al 2010   | 0.86       | 9.57 | < 0.00001 | 0.84 - 0.89 | 54%            |             |

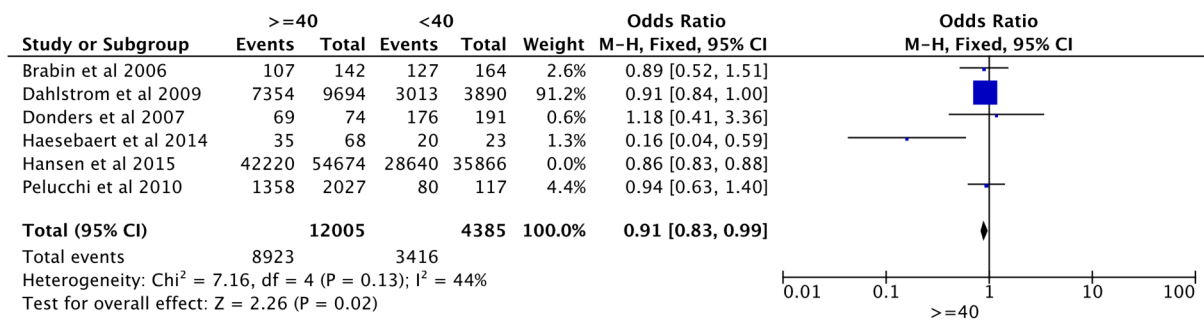**Figure S2: Forrest plot for the age of parent comparison excluding the Hansen et al. study**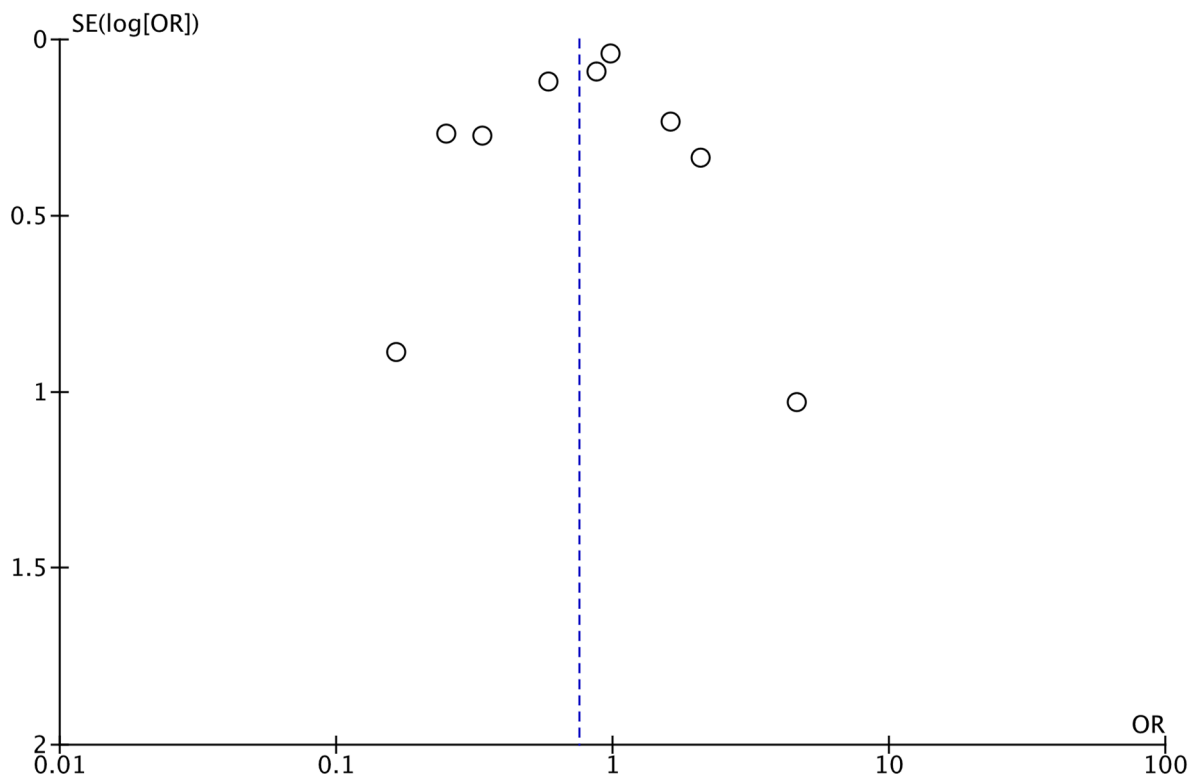**Figure S3: Funnel plot for the gender of parent comparison**

**Table S2: Sensitivity analysis for the gender of parent comparison**

| Study                  | Overall OR | Z    | P    | 95% CI      | I <sup>2</sup> | Initial CI  |
|------------------------|------------|------|------|-------------|----------------|-------------|
| Dahlstrom et al 2009   | 0.72       | 1.40 | 0.16 | 0.45 - 1.14 | 88%            | 0.54 - 1.04 |
| Ganczak et al 2018     | 0.67       | 2.30 | 0.02 | 0.48 - 0.94 | 89%            |             |
| Grandahl et al 2016    | 0.79       | 1.44 | 0.15 | 0.57 - 1.09 | 90%            |             |
| Lenselink et al 2007   | 0.72       | 1.95 | 0.05 | 0.52 - 1.00 | 90%            |             |
| Mari et al 2022        | 0.84       | 1.08 | 0.28 | 0.60 - 1.16 | 88%            |             |
| Pelucchi et al 2010    | 0.73       | 1.35 | 0.18 | 0.47 - 1.15 | 90%            |             |
| Sobierajski et al 2023 | 0.67       | 2.23 | 0.03 | 0.48 - 0.95 | 89%            |             |
| Sypien & Zielonka 2022 | 0.87       | 0.92 | 0.36 | 0.65 - 1.17 | 85%            |             |
| Waller et al 2019      | 0.79       | 1.28 | 0.20 | 0.55 - 1.13 | 88%            |             |

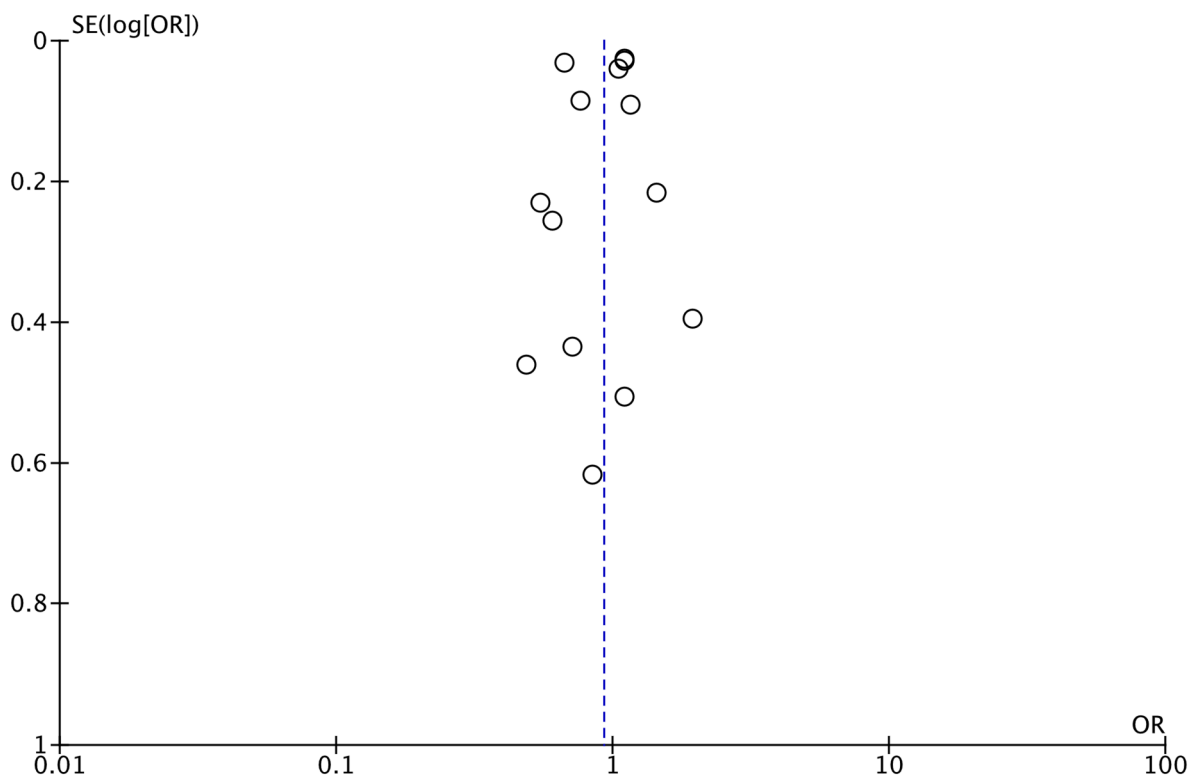

**Figure S4: Funnel plot for the parent's educational level comparison**

**Table S3: Sensitivity analysis for the parent's educational level comparison**

| Study                        | Overall OR | Z    | P    | 95% CI      | I <sup>2</sup> | Initial CI  |
|------------------------------|------------|------|------|-------------|----------------|-------------|
| Baumann et al 2019           | 0.95       | 0.63 | 0.53 | 0.80 - 1.12 | 93%            | 0.79 - 1.09 |
| Dahlstrom et al 2009         | 0.91       | 1.02 | 0.31 | 0.75 - 1.09 | 94%            |             |
| David et al 2022             | 0.92       | 0.98 | 0.33 | 0.78 - 1.08 | 94%            |             |
| Donders et al 2007           | 0.94       | 0.73 | 0.46 | 0.80 - 1.11 | 94%            |             |
| Feiring et al 2015           | 0.90       | 1.07 | 0.28 | 0.75 - 1.09 | 93%            |             |
| Gefenaite et al 2012         | 0.90       | 1.28 | 0.20 | 0.76 - 1.06 | 94%            |             |
| Grandahl et al 2016          | 0.93       | 0.92 | 0.36 | 0.79 - 1.09 | 94%            |             |
| Haesebaert et al 2014        | 0.90       | 1.23 | 0.22 | 0.77 - 1.06 | 94%            |             |
| Hansen et al 2015            | 0.90       | 1.09 | 0.28 | 0.75 - 1.09 | 92%            |             |
| Mari et al 2022              | 0.95       | 0.62 | 0.54 | 0.81 - 1.12 | 94%            |             |
| Pelucchi et al 2010          | 0.90       | 1.19 | 0.23 | 0.76 - 1.07 | 94%            |             |
| Rousset-Jablonski et al 2021 | 0.93       | 0.85 | 0.40 | 0.79 - 1.10 | 94%            |             |
| Schreiber et al 2015         | 1.01       | 0.14 | 0.89 | 0.91 - 1.11 | 70%            |             |
| Sobierajski et al 2023       | 0.96       | 0.51 | 0.61 | 0.81 - 1.13 | 94%            |             |

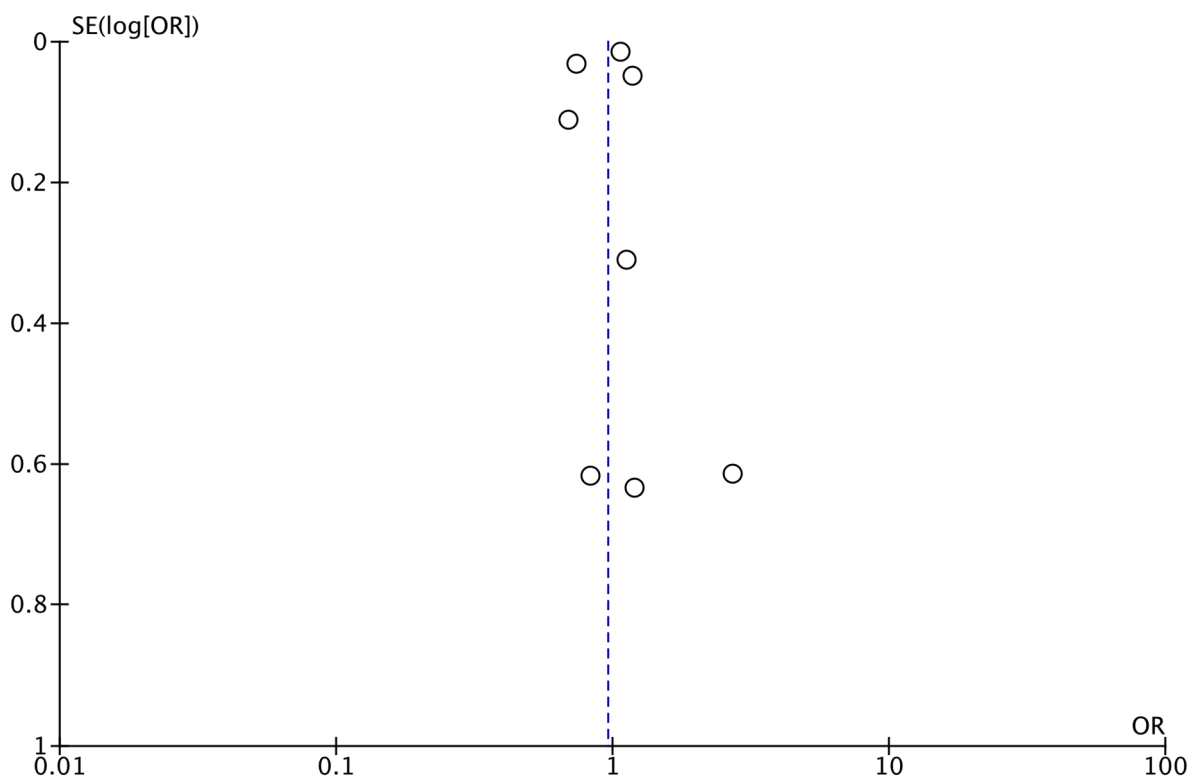

**Figure S5: Funnel plot for the parent's civil status comparison**

**Table S4: Sensitivity analysis for parent's civil status comparison**

| Study                 | Overall OR | Z    | P    | 95% CI      | I2  | Initial CI  |
|-----------------------|------------|------|------|-------------|-----|-------------|
| Baumann et al 2019    | 1.03       | 0.22 | 0.82 | 0.81 - 1.30 | 95% | 0.77 - 1.18 |
| Dahlstrom et al 2009  | 0.91       | 0.71 | 0.48 | 0.70 - 1.18 | 95% |             |
| Ganczak et al 2018    | 0.94       | 0.51 | 0.61 | 0.75 - 1.18 | 95% |             |
| Grandahl et al 2016   | 0.96       | 0.36 | 0.72 | 0.77 - 1.19 | 95% |             |
| Haesebaert et al 2014 | 0.93       | 0.67 | 0.50 | 0.75 - 1.15 | 95% |             |
| Hansen et al 2015     | 0.95       | 0.32 | 0.75 | 0.70 - 1.29 | 92% |             |
| Lenselink et al 2007  | 0.95       | 0.45 | 0.65 | 0.77 - 1.18 | 95% |             |
| Schreiber et al 2015  | 1.02       | 0.29 | 0.78 | 0.87 - 1.20 | 74% |             |

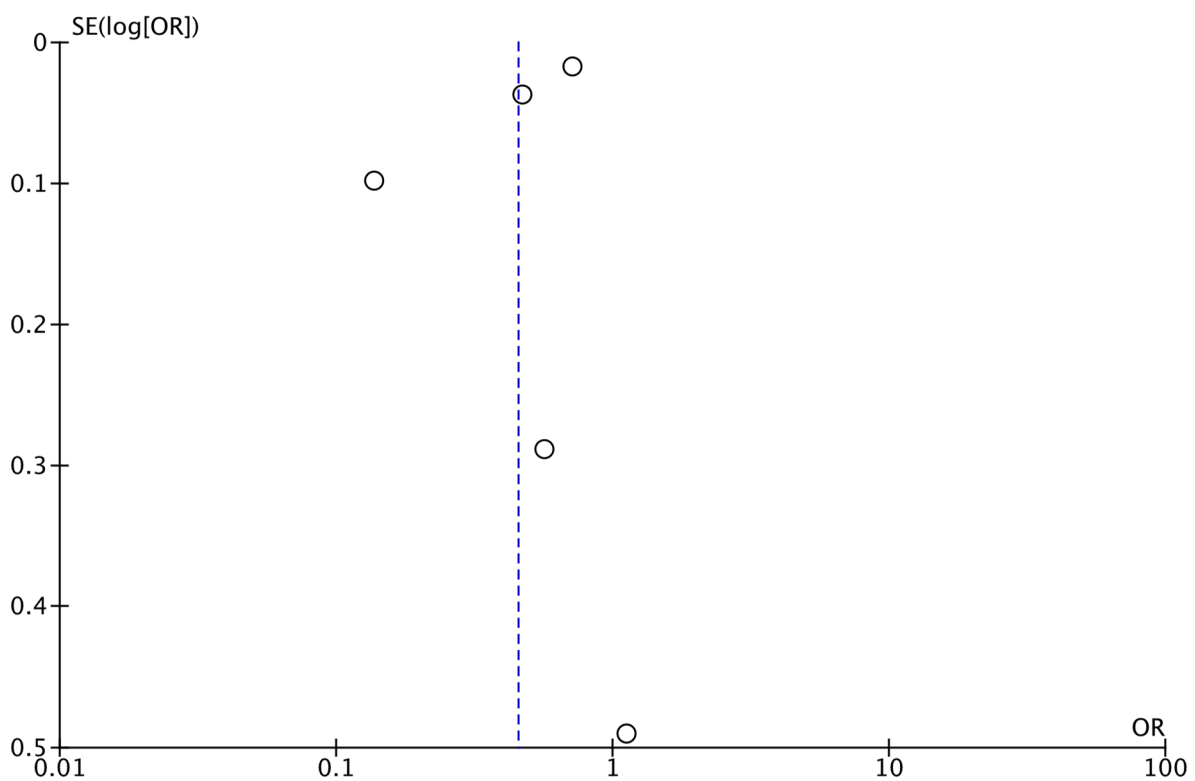**Figure S6: Funnel plot for parent employment status comparison****Table S5: Sensitivity analysis for parent employment status comparison**

| Study                 | Overall OR | Z    | P      | 95% CI      | I2  | Initial CI  |
|-----------------------|------------|------|--------|-------------|-----|-------------|
| Baumann et al 2019    | 0.62       | 2.72 | 0.006  | 0.44 - 0.87 | 97% | 0.28 - 0.74 |
| Ganczak et al 2018    | 0.43       | 3.03 | 0.002  | 0.25 - 0.74 | 99% |             |
| Haesebaert et al 2014 | 0.40       | 3.45 | 0.0006 | 0.24 - 0.67 | 99% |             |
| Hansen et al 2015     | 0.42       | 2.01 | 0.04   | 0.18 - 0.98 | 98% |             |
| Schreiber et al 2015  | 0.48       | 1.30 | 0.19   | 0.16 - 1.45 | 99% |             |

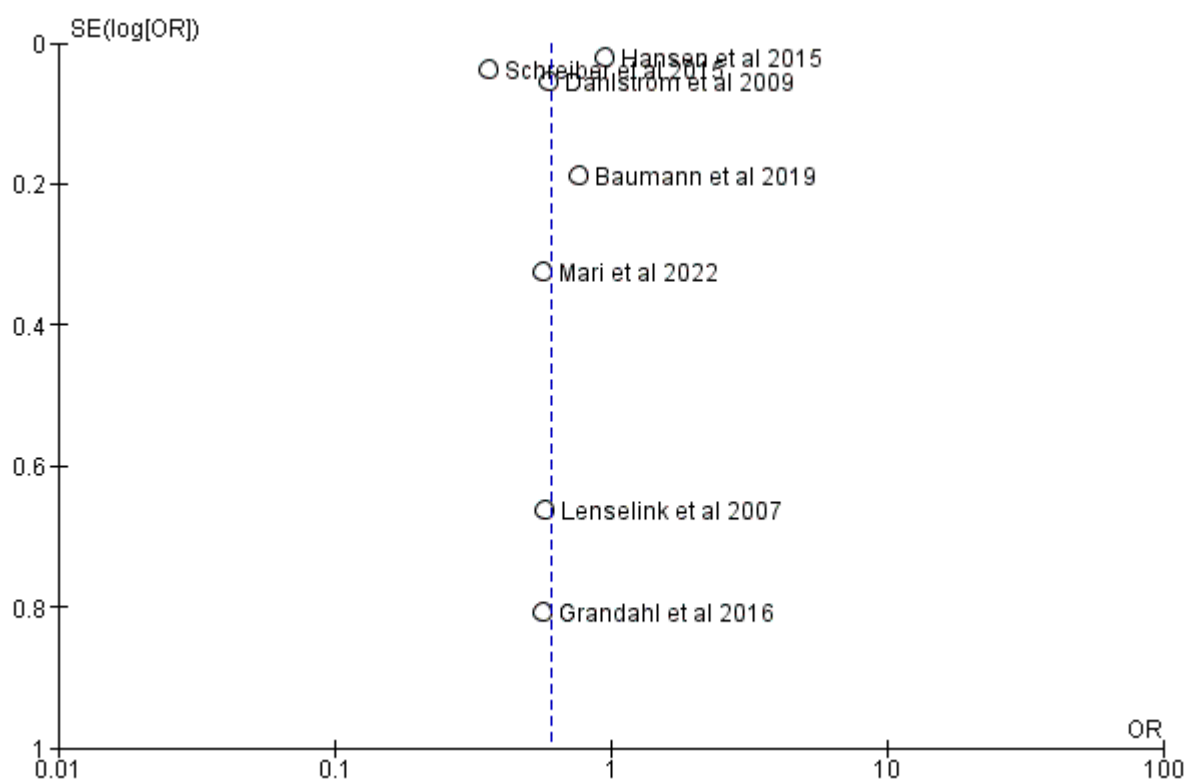

**Figure S7: Funnel plot for the immigrant status comparison**

**Table S6: Sensitivity analysis for the immigrant status comparison**

| Study                | Overall OR | Z    | P      | 95% CI      | I <sup>2</sup> | Initial CI  |
|----------------------|------------|------|--------|-------------|----------------|-------------|
| Baumann et al 2019   | 0.58       | 2.02 | 0.04   | 0.35 - 0.98 | 99%            | 0.38 - 0.98 |
| Dahlstrom et al 2009 | 0.61       | 1.60 | 0.11   | 0.34 - 1.12 | 99%            |             |
| Grandahl et al 2016  | 0.61       | 1.96 | 0.05   | 0.38 - 1.00 | 99%            |             |
| Hansen et al 2015    | 0.54       | 3.40 | 0.0007 | 0.38 - 0.77 | 92%            |             |
| Lenselink et al 2007 | 0.61       | 1.95 | 0.05   | 0.38 - 1.00 | 99%            |             |
| Mari et al 2022      | 0.62       | 1.85 | 0.06   | 0.37 - 1.03 | 99%            |             |
| Schreiber et al 2015 | 0.71       | 2.07 | 0.04   | 0.51 - 0.98 | 92%            |             |

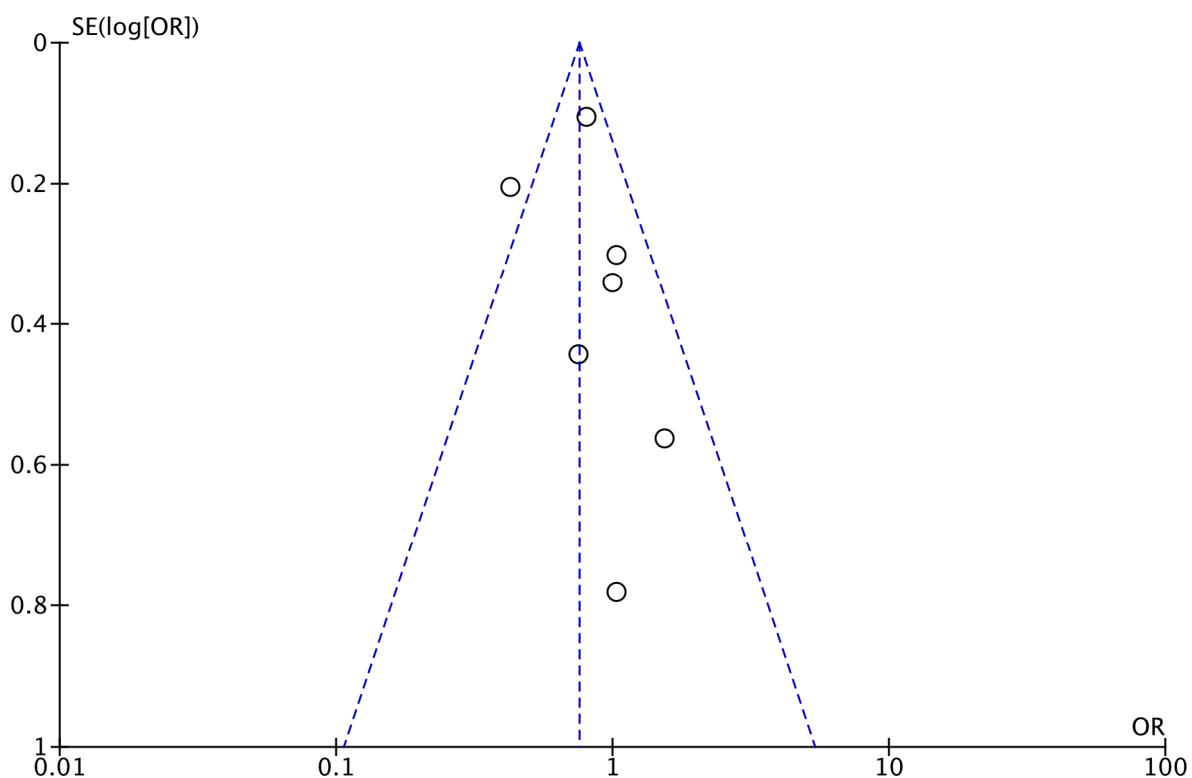

**Figure S8: Funnel plot for the religious status of the responder's comparison**

**Table S7: Sensitivity analysis for the religious status of the responder's comparison**

| Study                  | Overall OR | Z    | P      | 95% CI      | I <sup>2</sup> | Initial CI  |
|------------------------|------------|------|--------|-------------|----------------|-------------|
| Bedford et al 2021     | 0.68       | 2.80 | 0.005  | 0.52 - 0.89 | 53%            | 0.64 - 0.89 |
| Brabin et al 2006      | 0.74       | 3.50 | 0.0005 | 0.63 - 0.88 | 53%            |             |
| Ganczak et al 2018     | 0.75       | 3.42 | 0.0006 | 0.64 - 0.89 | 56%            |             |
| Gefenaite et al 2012   | 0.85       | 1.82 | 0.07   | 0.71 - 1.01 | 0%             |             |
| Grandahl et al 2016    | 0.74       | 3.54 | 0.0004 | 0.63 - 0.88 | 49%            |             |
| Lenselink et al 2007   | 0.75       | 3.33 | 0.0009 | 0.64 - 0.89 | 56%            |             |
| Sypien & Zielonka 2022 | 0.74       | 3.55 | 0.0004 | 0.62 - 0.87 | 52%            |             |

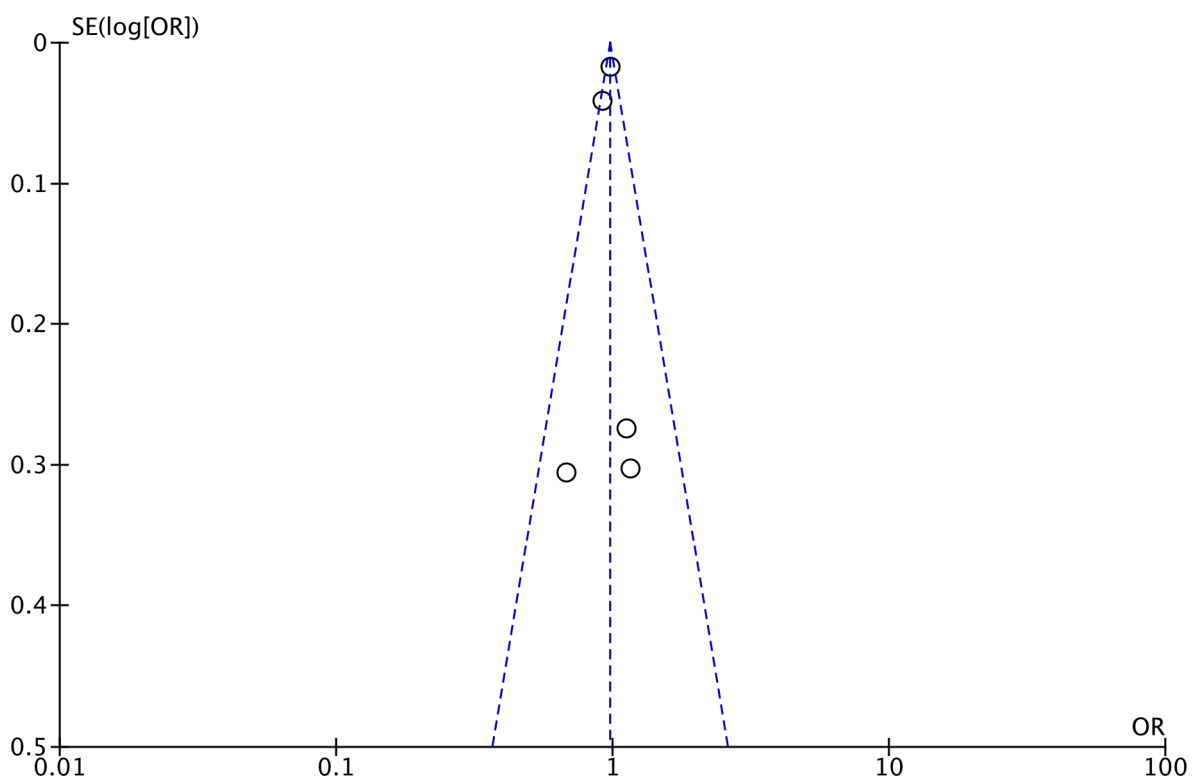

**Figure S9: Funnel plot for the number of children comparison**

**Table S8: Sensitivity analysis for the number of children comparison**

| Study                  | Overall OR | Z    | P    | 95% CI      | I <sup>2</sup> | Initial CI  |
|------------------------|------------|------|------|-------------|----------------|-------------|
| Brabin et al 2006      | 0.97       | 1.80 | 0.07 | 0.94 - 1.00 | 9%             | 0.94 - 1.00 |
| Dahlstrom et al 2009   | 0.98       | 1.18 | 0.24 | 0.95 - 1.01 | 0%             |             |
| Ganczak et al 2018     | 0.97       | 1.80 | 0.07 | 0.94 - 1.00 | 8%             |             |
| Hansen et al 2015      | 0.93       | 1.80 | 0.07 | 0.86 - 1.01 | 0%             |             |
| Sypien & Zielonka 2022 | 0.97       | 1.70 | 0.09 | 0.94 - 1.00 | 0%             |             |

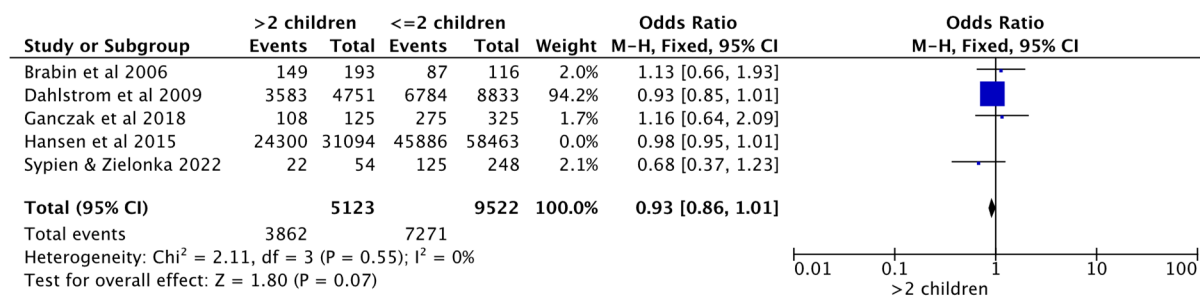

**Figure S10: Forrest plot for the number of children comparison excluding the Hansen et al. study**



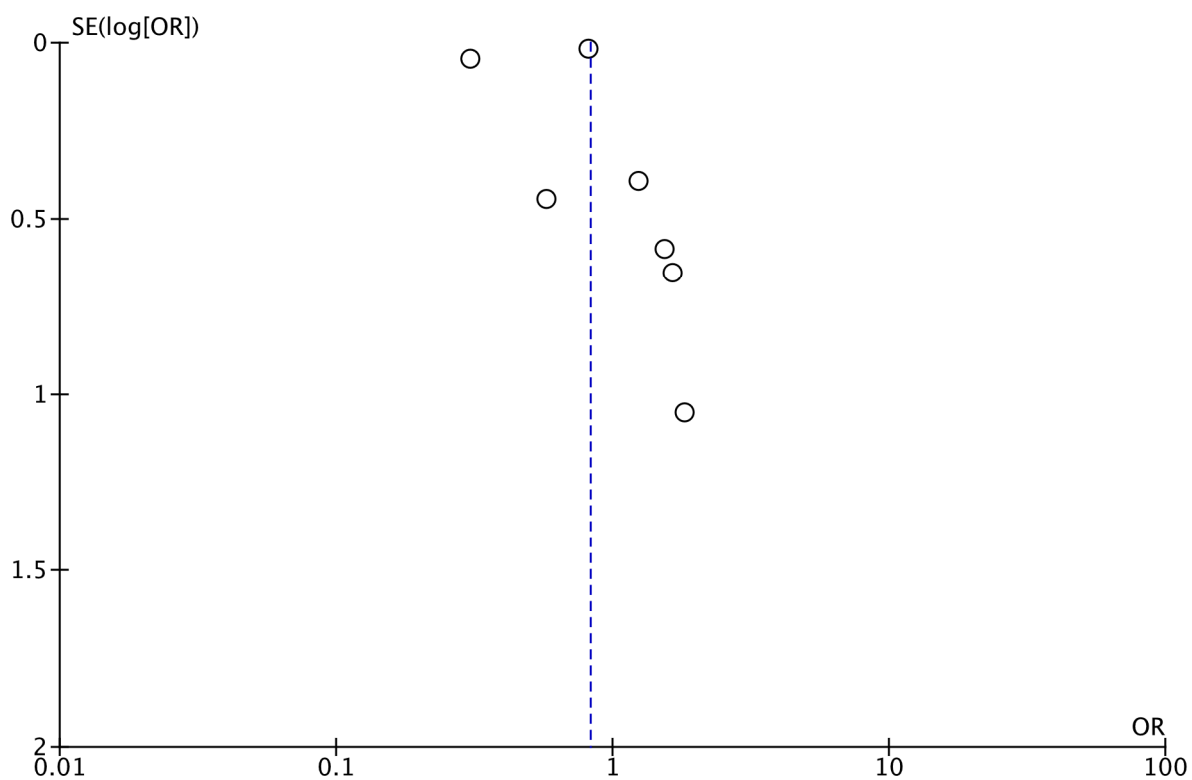

**Figure S11: Funnel plot for the mother's history of CCS**

**Table S9: Sensitivity analysis for the mother's history of CCS**

| Study                        | Overall OR | Z     | P         | 95% CI      | I <sup>2</sup> | Initial CI  |
|------------------------------|------------|-------|-----------|-------------|----------------|-------------|
| David et al 2022             | 0.76       | 0.83  | 0.41      | 0.40 - 1.45 | 99%            | 0.45 - 1.52 |
| Gefenaite et al 2012         | 0.77       | 0.77  | 0.44      | 0.39 - 1.50 | 99%            |             |
| Haesebaert et al 2014        | 0.76       | 0.82  | 0.41      | 0.40 - 1.46 | 99%            |             |
| Hansen et al 2015            | 0.87       | 0.33  | 0.74      | 0.39 - 1.97 | 84%            |             |
| Lenselink et al 2007         | 0.79       | 0.75  | 0.45      | 0.42 - 1.48 | 99%            |             |
| Rousset-Jablonski et al 2021 | 0.88       | 0.37  | 0.71      | 0.45 - 1.71 | 99%            |             |
| Spencer et al 2007           | 0.82       | 10.20 | < 0.00001 | 0.79 - 0.85 | 0%             |             |

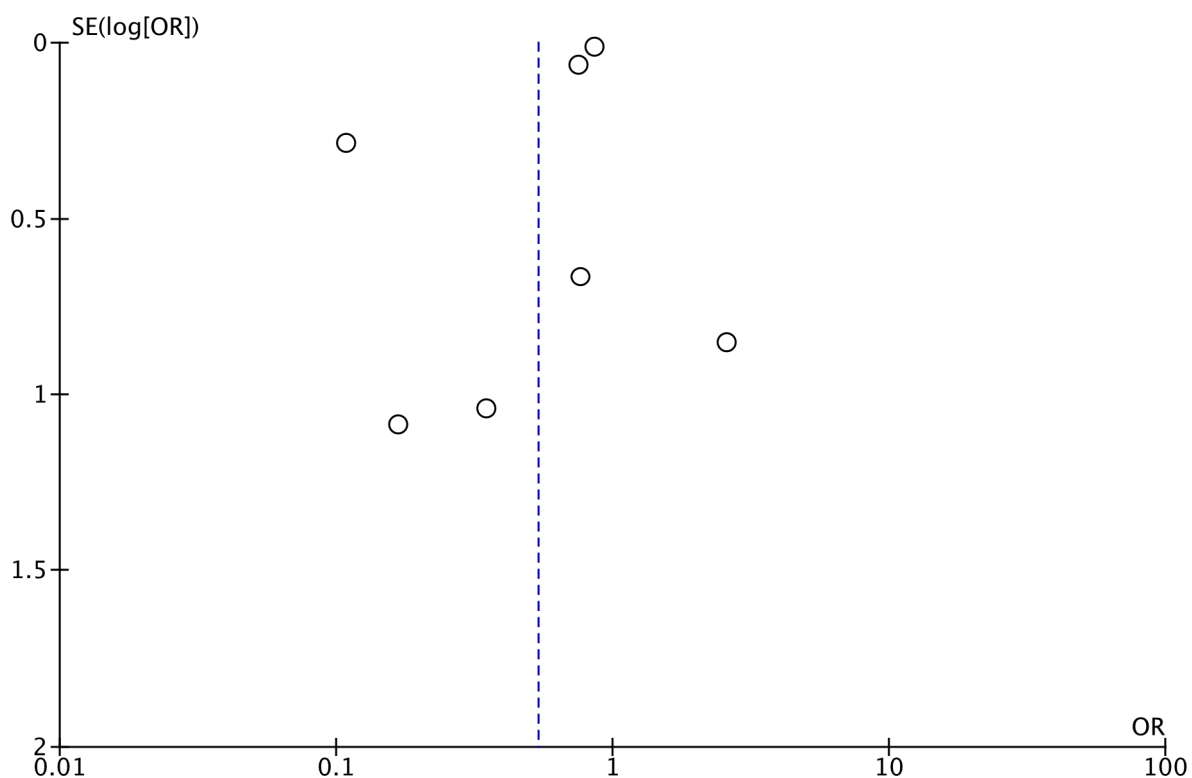

**Figure S12: Funnel plot for the mother's Pap history comparison**

**Table S10: Sensitivity analysis for the mother's Pap history comparison**

| Study                        | Overall OR | Z    | P      | 95% CI      | I <sup>2</sup> | Initial CI  |
|------------------------------|------------|------|--------|-------------|----------------|-------------|
| David et al 2022             | 0.50       | 3.47 | 0.0005 | 0.34 - 0.74 | 91%            | 0.36 - 0.79 |
| Dib et al 2022               | 0.81       | 2.87 | 0.004  | 0.70 - 0.94 | 43%            |             |
| Haesebaert et al 2014        | 0.56       | 2.95 | 0.003  | 0.38 - 0.82 | 91%            |             |
| Hansen et al 2015            | 0.47       | 1.33 | 0.18   | 0.15 - 1.44 | 91%            |             |
| Lenselink et al 2007         | 0.54       | 3.03 | 0.002  | 0.37 - 0.81 | 92%            |             |
| Rousset-Jablonski et al 2021 | 0.52       | 3.16 | 0.002  | 0.35 - 0.78 | 92%            |             |
| Spencer et al 2007           | 0.45       | 1.46 | 0.14   | 0.16 - 1.31 | 89%            |             |

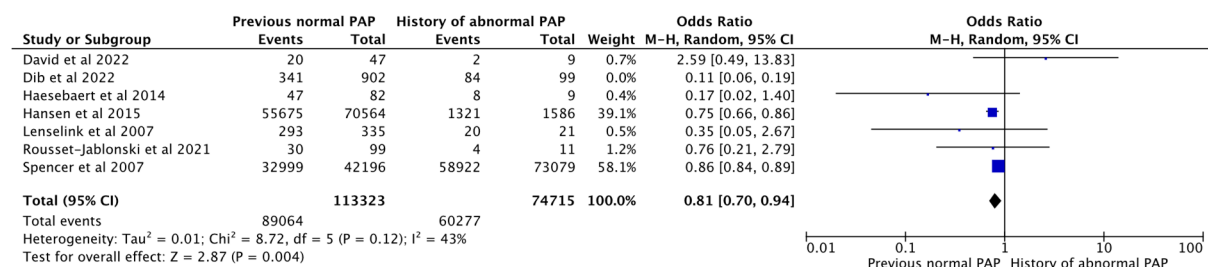

**Figure S13: Forrest plot for the mother's Pap history comparison excluding the Dib et al. study**

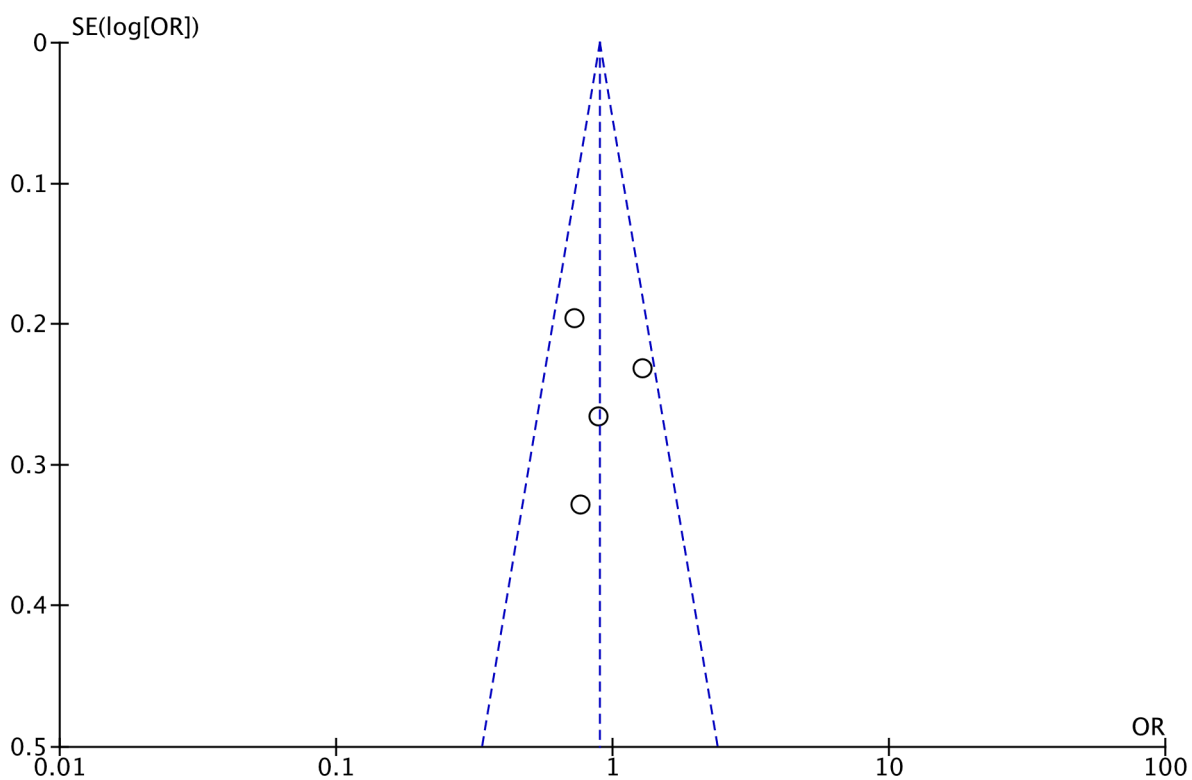

**Figure S14: Funnel plot for the family history of cancer comparison**

**Table S11: Sensitivity analysis for the family history of cancer comparison**

| Study                  | Overall OR | Z    | P    | 95% CI      | I <sup>2</sup> | Initial CI  |
|------------------------|------------|------|------|-------------|----------------|-------------|
| Ganczak et al 2018     | 0.89       | 0.83 | 0.41 | 0.68 - 1.17 | 48%            | 0.70 - 1.13 |
| Gefenaite et al 2012   | 1.01       | 0.09 | 0.93 | 0.75 - 1.37 | 2%             |             |
| Lenselink et al 2007   | 0.91       | 0.69 | 0.49 | 0.71 - 1.18 | 44%            |             |
| Sypien & Zielonka 2022 | 0.78       | 1.78 | 0.08 | 0.59 - 1.03 | 0%             |             |

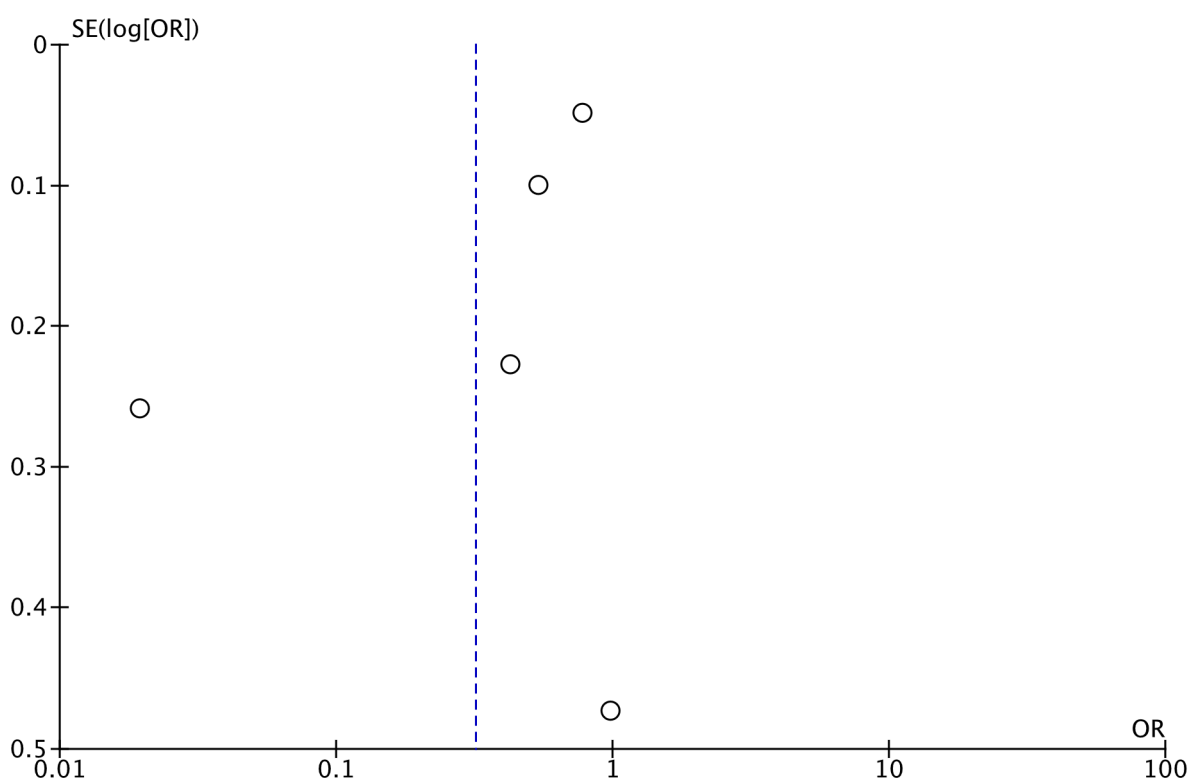

**Figure S15: Funnel plot for the child's gender comparison**

**Table S12: Sensitivity analysis for the child's gender comparison**

| Study                  | Overall OR | Z    | P     | 95% CI      | I2  | Initial CI  |
|------------------------|------------|------|-------|-------------|-----|-------------|
| Dahlstrom et al 2009   | 0.25       | 1.75 | 0.08  | 0.05 - 1.18 | 98% | 0.13 - 0.76 |
| Donders et al 2007     | 0.62       | 3.01 | 0.003 | 0.45 - 0.85 | 82% |             |
| Lenselink et al 2007   | 0.25       | 2.80 | 0.005 | 0.10 - 0.66 | 99% |             |
| Pelucchi et al 2010    | 0.28       | 1.51 | 0.13  | 0.05 - 1.46 | 99% |             |
| Sobierajski et al 2023 | 0.30       | 2.32 | 0.02  | 0.11 - 0.83 | 99% |             |

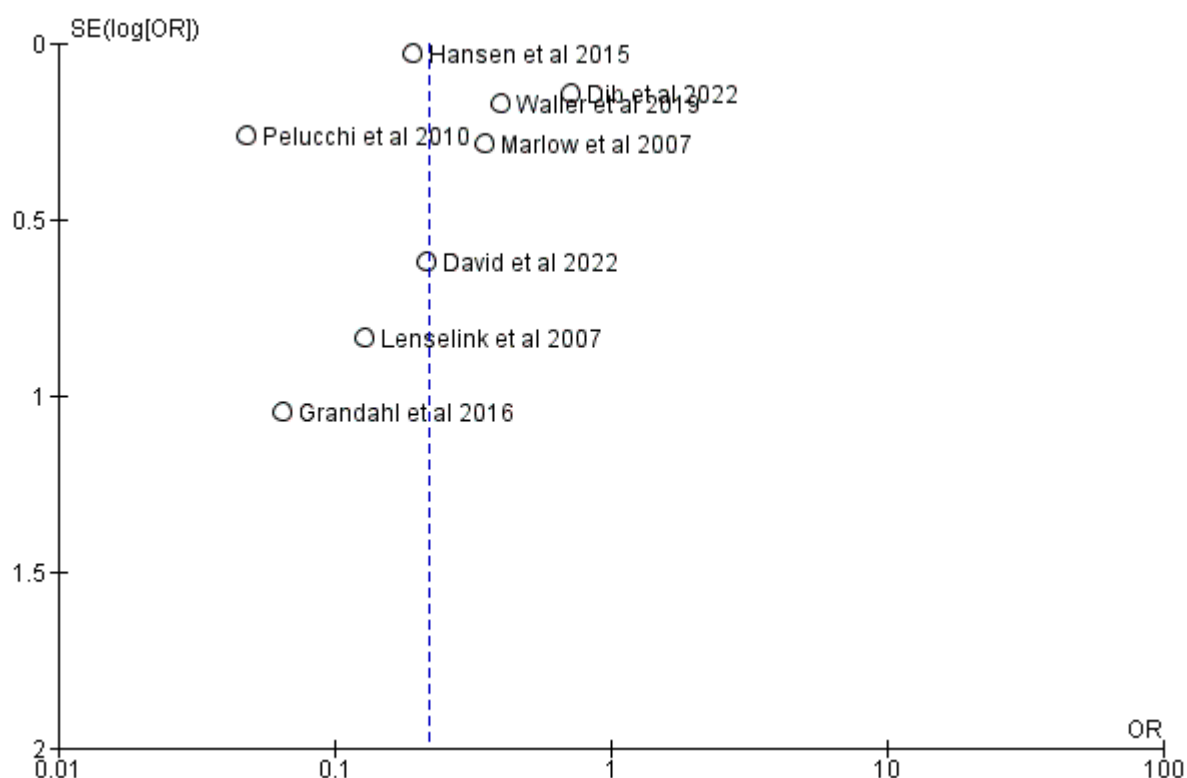

**Figure S16: Funnel plot for the history of childhood vaccination comparison**

**Table S13: Sensitivity analysis for History of childhood vaccination for children**

| Study                | Overall OR | Z    | P         | 95% CI      | I <sup>2</sup> | Initial CI  |
|----------------------|------------|------|-----------|-------------|----------------|-------------|
| David et al 2022     | 0.22       | 4.64 | < 0.00001 | 0.11 - 0.42 | 95%            | 0.12 - 0.40 |
| Dib et al 2022       | 0.18       | 6.16 | < 0.00001 | 0.10 - 0.31 | 89%            |             |
| Grandahl et al 2016  | 0.23       | 4.56 | < 0.00001 | 0.23 - 0.44 | 95%            |             |
| Hansen et al 2015    | 0.21       | 3.62 | 0.0003    | 0.09 - 0.49 | 93%            |             |
| Lenselink et al 2007 | 0.23       | 4.59 | < 0.00001 | 0.12 - 0.43 | 95%            |             |
| Marlow et al 2007    | 0.20       | 4.66 | < 0.00001 | 0.10 - 0.39 | 95%            |             |
| Pelucchi et al 2010  | 0.29       | 3.97 | < 0.0001  | 0.16 - 0.53 | 94%            |             |
| Waller et al 2019    | 0.19       | 4.51 | < 0.00001 | 0.09 - 0.39 | 95%            |             |

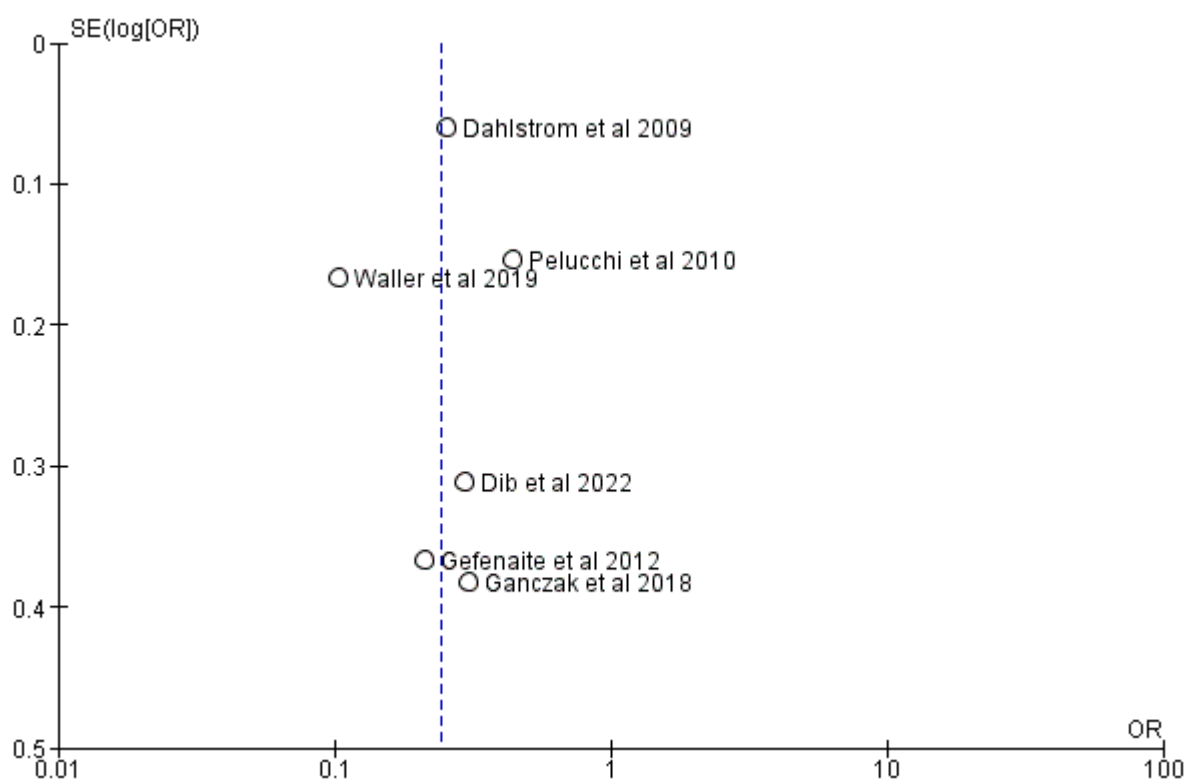

**Figure S17: Funnel plot for the perceived efficacy comparison**

**Table S14: Sensitivity analysis for HPV vaccine efficacy comparison**

| Study                | Overall OR | Z    | P         | 95% CI      | I <sup>2</sup> | Initial CI  |
|----------------------|------------|------|-----------|-------------|----------------|-------------|
| Dahlstrom et al 2009 | 0.24       | 3.97 | < 0.0001  | 0.12 - 0.49 | 91%            | 0.16 - 0.37 |
| Dib et al 2022       | 0.24       | 5.79 | < 0.00001 | 0.14 - 0.38 | 91%            |             |
| Ganczak et al 2018   | 0.24       | 5.94 | < 0.00001 | 0.15 - 0.38 | 91%            |             |
| Gefenaite et al 2012 | 0.25       | 5.67 | < 0.00001 | 0.15 - 0.40 | 91%            |             |
| Pelucchi et al 2010  | 0.21       | 6.39 | < 0.00001 | 0.13 - 0.34 | 86%            |             |
| Waller et al 2019    | 0.30       | 7.60 | < 0.00001 | 0.22 - 0.41 | 66%            |             |

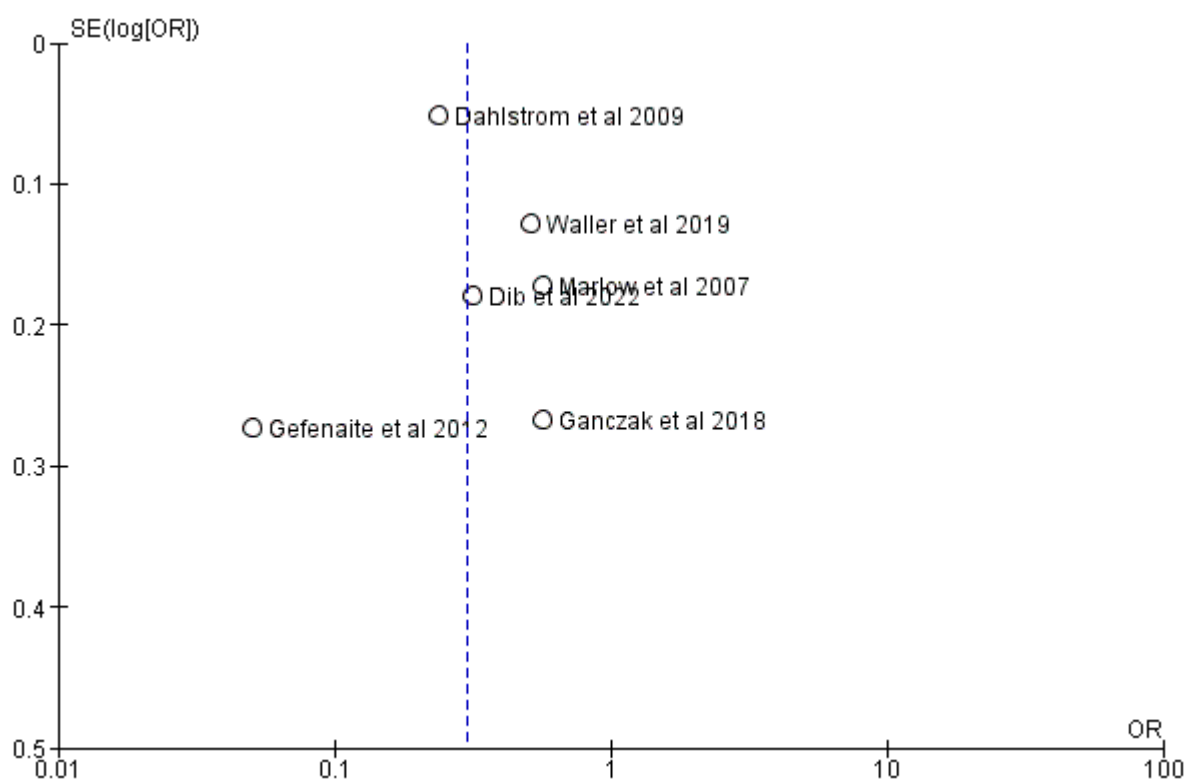

**Figure S18: Funnel plot for the perceived safety comparison**

**Table S15: Sensitivity analysis for perceived safety of the HPV vaccine**

| Study                | Overall OR | Z    | P         | 95% CI      | I <sup>2</sup> | Initial CI  |
|----------------------|------------|------|-----------|-------------|----------------|-------------|
| Dahlstrom et al 2009 | 0.31       | 3.31 | 0.0009    | 0.16 - 0.62 | 94%            | 0.18 - 0.50 |
| Dib et al 2022       | 0.30       | 3.94 | < 0.0001  | 0.16 - 0.54 | 96%            |             |
| Ganczak et al 2018   | 0.27       | 4.69 | < 0.00001 | 0.15 - 0.46 | 95%            |             |
| Gefenaite et al 2012 | 0.41       | 3.99 | < 0.0001  | 0.26 - 0.63 | 93%            |             |
| Marlow et al 2007    | 0.26       | 4.73 | < 0.00001 | 0.15 - 0.46 | 95%            |             |
| Waller et al 2019    | 0.27       | 4.45 | < 0.00001 | 0.15 - 0.48 | 94%            |             |

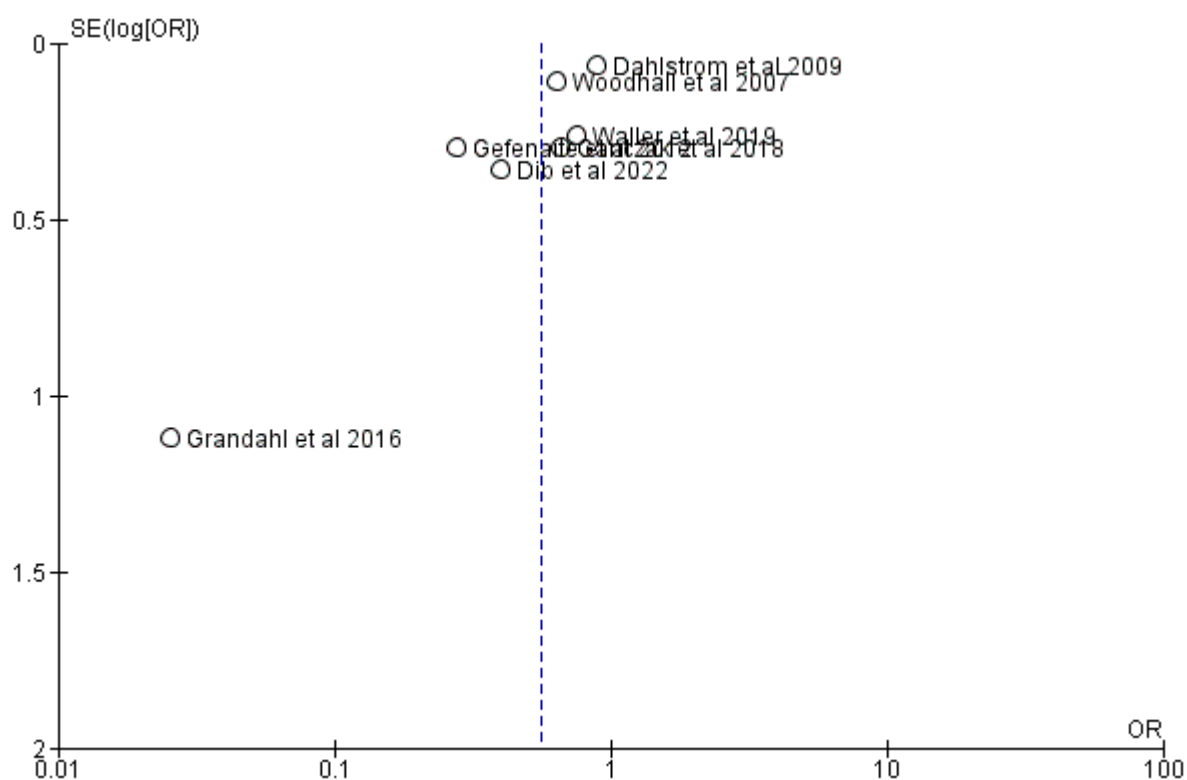

**Figure S19: Funnel plot for the perceived increased risk behavior after vaccination comparison**

**Table S16: Sensitivity analysis for the perceived increased risk behavior after vaccination comparison**

| Study                 | Overall OR | Z    | P      | 95% CI      | I2  | Initial CI  |
|-----------------------|------------|------|--------|-------------|-----|-------------|
| Dahlstrom et al 2009  | 0.48       | 3.44 | 0.0006 | 0.31 - 0.73 | 71% | 0.39 - 0.79 |
| Dibi et al 2022       | 0.58       | 2.90 | 0.004  | 0.40 - 0.84 | 83% |             |
| Ganczak et al 2018    | 0.53       | 3.14 | 0.002  | 0.36 - 0.79 | 85% |             |
| Gefenaitte et al 2012 | 0.64       | 2.71 | 0.007  | 0.47 - 0.89 | 76% |             |
| Grandahl et al 2016   | 0.61       | 3.17 | 0.002  | 0.45 - 0.83 | 79% |             |
| Waller et al 2019     | 0.52       | 3.22 | 0.001  | 0.35 - 0.77 | 85% |             |
| Woodhall et al 2007   | 0.49       | 2.67 | 0.008  | 0.29 - 0.83 | 83% |             |



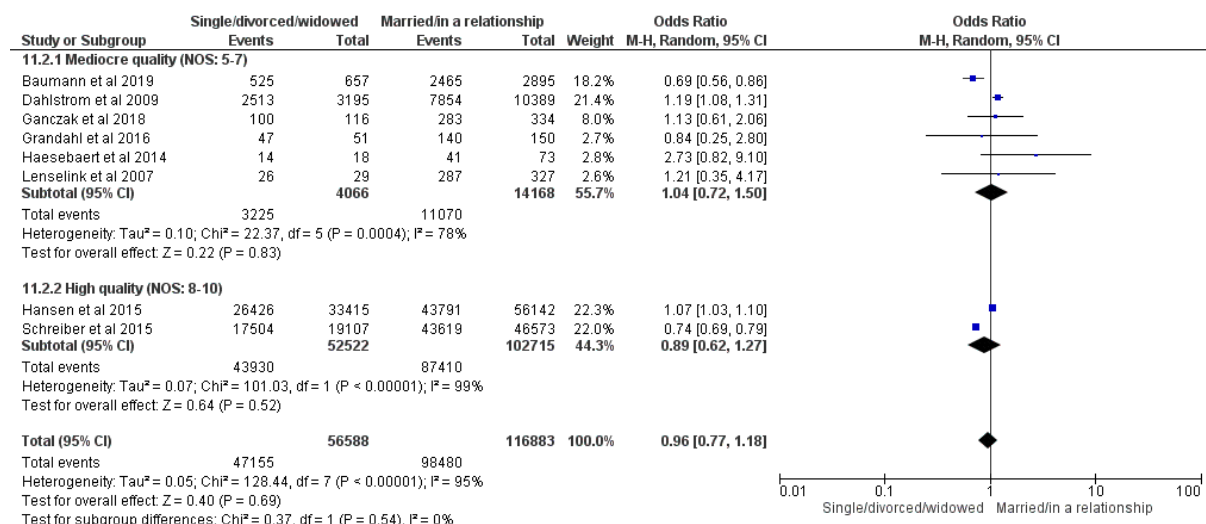

**Figure S20: Forrest plot for the parents' civil status with subgroups based on the NOS scoring**

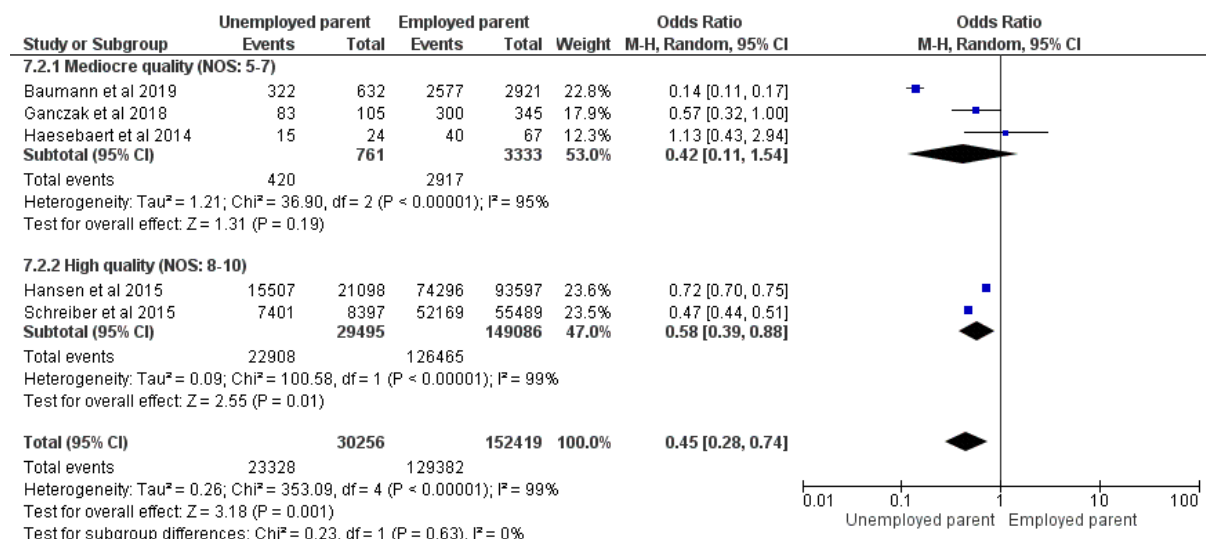

**Figure S21: Forrest plot for the parents' employment status with subgroups based on the NOS scoring**

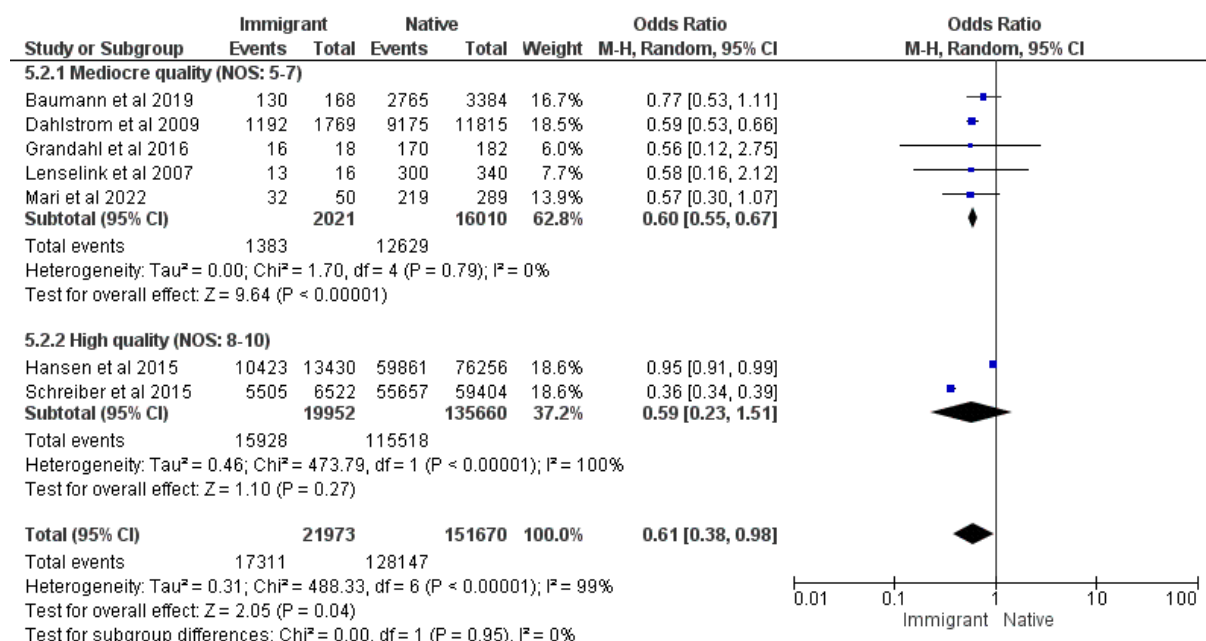

**Figure S22: Forrest plot for the parents' immigrant status with subgroups based on the NOS scoring**

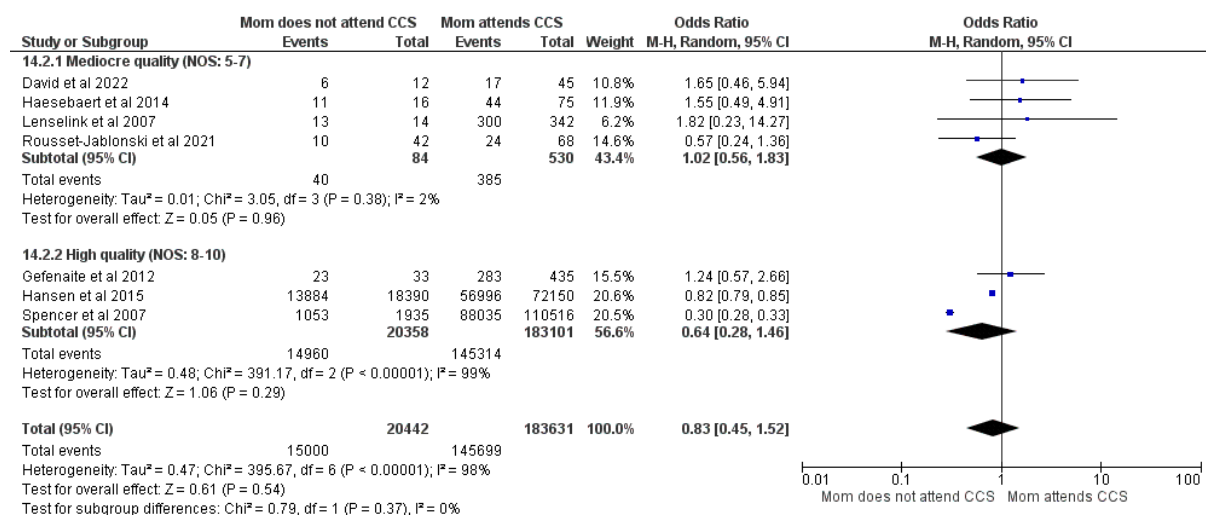

**Figure S23: Forrest plot for the mother's previous CCS attendance with subgroups based on the NOS scoring**

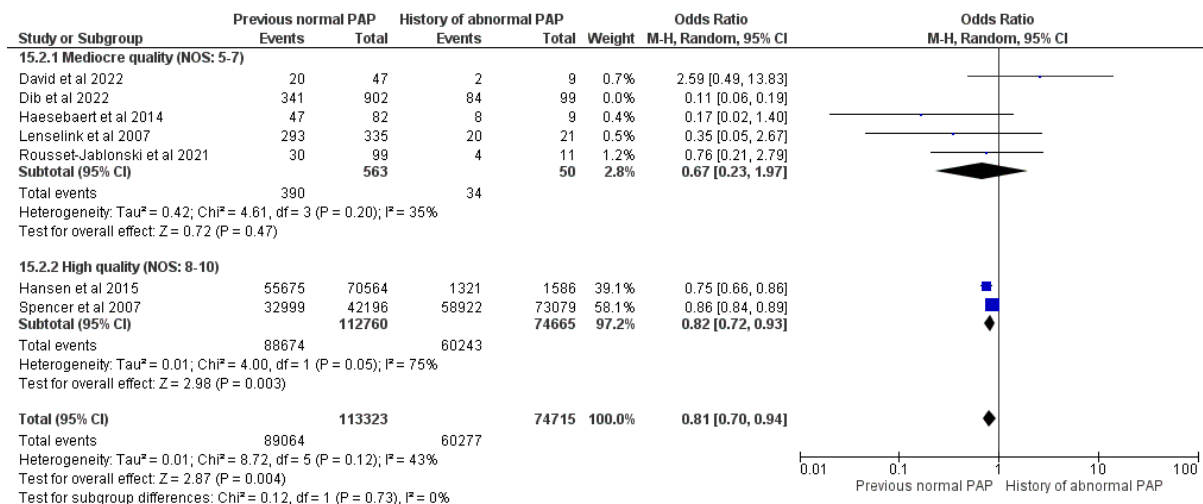

**Figure S24: Forrest plot for the mother's previous PAP results with subgroups based on the NOS scoring**

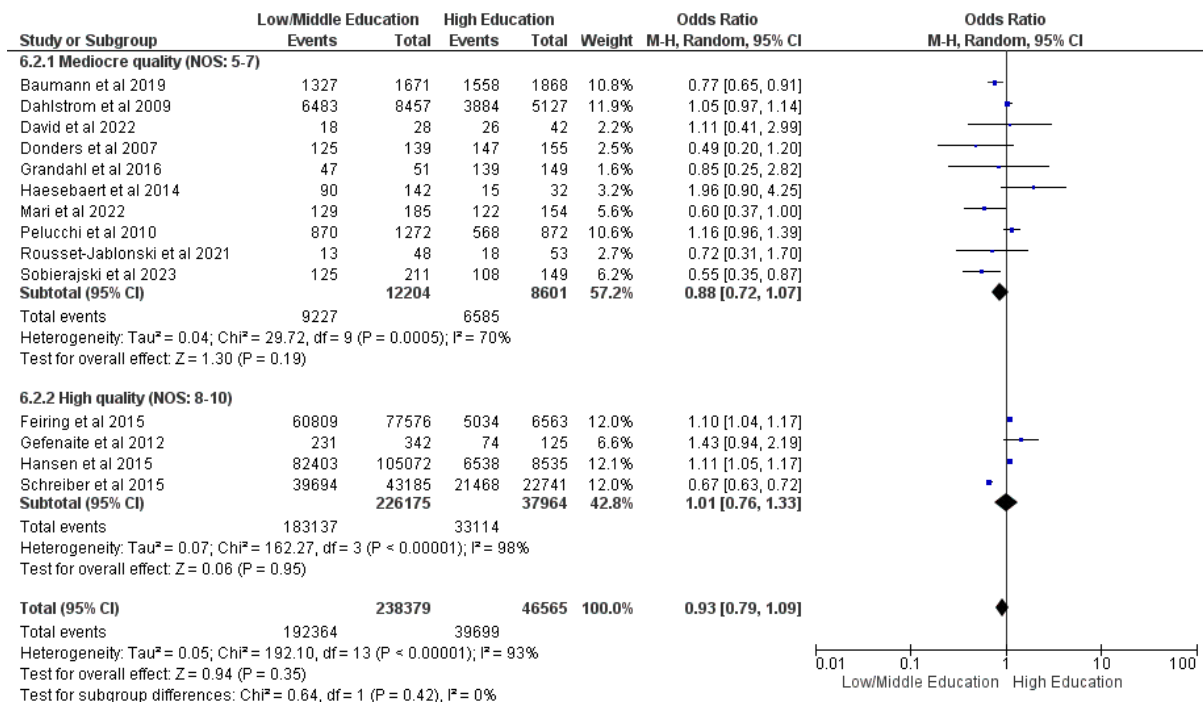

**Figure S25: Forrest plot for the parents' education levels with subgroups based on the NOS scoring**
